# Supplementary material
Source: PubMed Central journal article supplement (PMC3014300)
Supplement: supp_110.170431_JPET170431_a2_Targeting_supplemental.pdf [file supp_110.170431_JPET170431_a2_Targeting_supplemental.pdf]

# Inhaled anesthetic responses of recombinant receptors and knockin mice harboring $\alpha 2$ (S<sub>270</sub>H/L<sub>277</sub>A) GABA<sub>A</sub> receptor subunits that are resistant to isoflurane.

Werner, Swihart, Rau, Jia, Borghese, McCracken, Iyer, Fanselow, Oh, Sonner, Eger, Harrison, Harris and Homanics  
The Journal of Pharmacology and Experimental Therapeutics

## GABA<sub>A</sub>-R $\alpha 2$ (S<sub>270</sub>H;L<sub>277</sub>A) Genotype Analysis

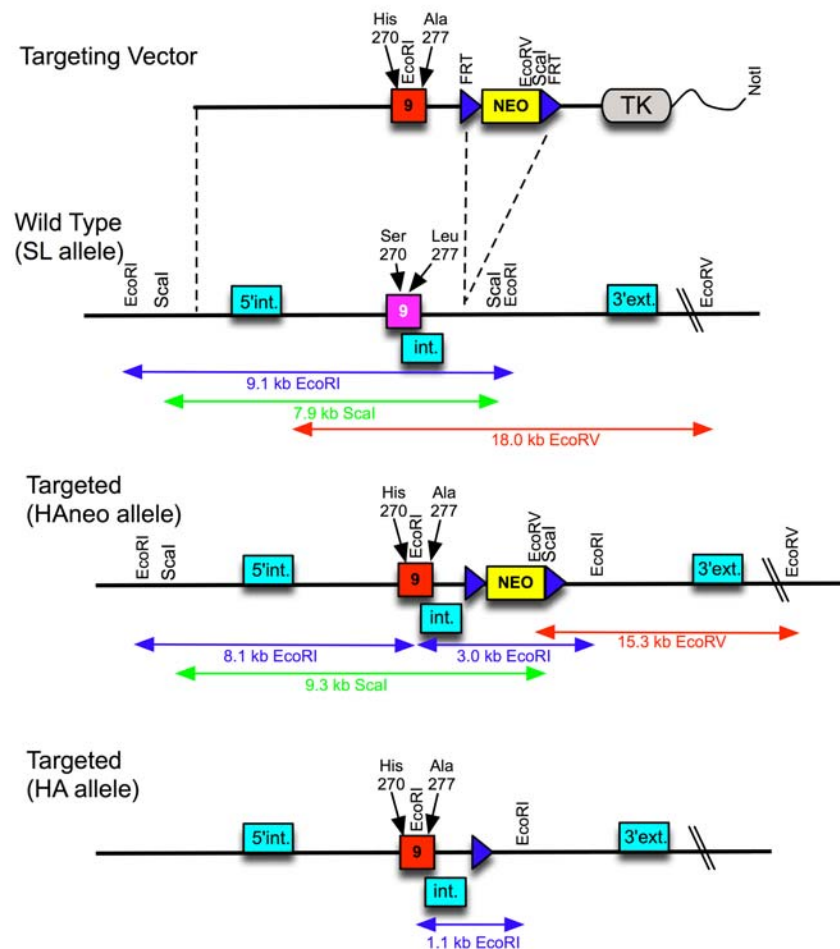

**Figure S1.** Details of genotype analysis by Southern blotting. Embryonic stem cells were screened for gene targeting using EcoRV and a 3' external probe (3'ext.). The presence of the mutations in Exon 9 were established with EcoRI and an internal probe (int.). Putatively targeted clones were further analyzed with EcoRI or Scal and a 5' internal probe (5'int.). Mice were genotyped using EcoRI and an internal probe. (Notes: Only restriction sites used for genotyping are shown. Not all fragments are drawn to scale. The 5' internal probe is 533bp EcoRV fragment. The internal probe is a 739bp EcoRI-NdeI fragment isolated from a plasmid harboring the HA sequence. The 3' external probe is a 276bp PCR fragment amplified using 5'-CCAGAAGAACAAAGGTTGGATTCC-3' and 5'-GCAAACAGTTGGTCA AACACATAGC-3' primers.)
